# Supplementary material for: Aliens Among Us: Sensitivity of the Invasive Alien Fish Black Bullhead Ameiurus melas as a Bioindicator of Pollution and Its Safety for Human Consumption
Source: Preprints.org preprint supplement (doi:10.20944/preprints202411.0480.v1), 2024-11-07
Supplement: Supplementary file 1 [file supplementary]

**Table S1**: Lower detection threshold (mg/L) and detection wavelength (λ) of the ICP-OES

|  | **Lower detection threshold (mg/L)** | **Detection wavelength *(λ)*** |
| --- | --- | --- |
| **Al** | 0.01 | 396.153 |
| **As** | 0.02 | 193.696 |
| **Ba** | 0.01 | 233.527 |
| **B** | 0.02 | 249.677 |
| **Cd** | 0.01 | 228.802 |
| **Cr** | 0.005 | 267.716 |
| **Co** | 0.005 | 228.616 |
| **Cu** | 0.005 | 327.393 |
| **Pb** | 0.01 | 220.353 |
| **Li** | 0.002 | 670.784 |
| **Se** | 0.02 | 196.026 |
| **Ag** | 0.01 | 328.068 |
| **Sb** | 0.01 | 206.836 |
| **Mo** | 0.005 | 202.031 |
| **Pt** | 0.01 | 265.945 |
| **Rh** | 0.01 | 343.489 |
| **Sn** | 0.01 | 189.927 |
| **Ti** | 0.005 | 334.940 |
| **Sr** | 0.001 | 407.771 |
| **Fe** | 0.001 | 238.204 |
| **Zn** | 0.005 | 206.200 |
| **Mn** | 0.001 | 257.610 |
| **Ni** | 0.005 | 231.604 |

**Table S2**: List of pesticide residues – information related to pesticide definition, chemical classification and pesticides action, retention time, quantify and qualifier ions

| **Analite** | **Chemical Class** | **Pesticide action*** | **Retention time, min** | **Quantify trace** | **Qualifier ion,**  1 ˃ 2 ˃ 3 | **Serial number** |
| --- | --- | --- | --- | --- | --- | --- |
| **Dichlorvos** | Organophosphate | IN | 5.45 | 109 | 187 ˃79 ˃185 | 1 |
| **Acephate** | Organophosphate | IN | 7.45 | 136 | 94 ˃95 ˃42 | 2 |
| **Propoxur** | Carbamate | IN | 9.15 | 110 | 152 ˃57 ˃111 | 3 |
| **Omethoate** | Organophosphate | IN, AC | 10.05 | 121 | 156 ˃110 ˃109 | 4 |
| **Ethoprophos** | Organophosphate | IN, NE | 10.39 | 158 | 97 ˃126 ˃139 | 5 |
| **Diphenylamine** | Aromatic amine | FU, PG | 10.48 | 137 | 169 ˃168 ˃170 | 6 |
| **Chlorpropham** | Carbamate | PG, HB | 11.20 | 148 | 127 ˃213˃153 | 7 |
| **Dioxabenzofos** | Organophosphate | IN | 11.26 | 158 | 216 ˃183˃201 | 8 |
| **Alpha Lindan** | Organochlorine | IN | 11.74 | 181 | 183 ˃ 219˃217 | 9 |
| **Dimethoate** | Organophosphate | IN | 12.34 | 194 | 93 ˃ 125 ˃143 | 10 |
| **Carbofuran** | Carbamate | IN, NE, AC | 12.59 | 204 | 149 ˃131 ˃123 | 11 |
| **Beta Lindan** | Organochlorine | IN | 13.09 | 219 | 181 ˃183 ˃217 | 12 |
| **Lindan** | Organochlorine | IN | 13.14 | 181 | 183 ˃219 ˃111 | 13 |
| **Diazinon** | Organophosphate | IN | 13.78 | 179 | 137 ˃152 ˃199 | 14 |
| **Delta HCH** | Organochlorine | IN | 14.65 | 181 | 219 ˃183 ˃217 | 15 |
| **Phosphamidon I** | Organophosphate | IN, AC | 14.70 | 254 | 127 ˃264˃72 | 16 |
| **Pyrimethanil** | Anilinopyrimidine | FU | 14.75 | 250 | 198 ˃199˃200 | 17 |
| **Phosphamidon II** | Organophosphate | IN, AC | 16.2 | 327 | 127 ˃264˃72 | 18 |
| **Methyl Parathion** | Organophosphate | IN | 16.28 | 263 | 109 ˃125 ˃79 | 19 |
| **Spiroxamine I** | Morpholine | FU | 16.33 | 100 | 101 ˃126 ˃198 | 20 |
| **Heptachlor** | Organochlorine | IN | 16.49 | 100 | 270 ˃272 ˃274 | 21 |
| **Chlorpyriphos methyl** | Organophosphate | IN, AC | 16.58 | 338 | 286 ˃288 ˃125 | 22 |
| **Vinclozolin** | Dicarboximide | FU | 16.63 | 340 | 212 ˃285˃198 | 23 |
| **Carbaryl** | Carbamate | IN, PG | 16.66 | 144 | 115 ˃116 ˃145 | 24 |
| **Metalaxyl** | Phenylamide | FU | 16.77 | 206 | 45 ˃160 ˃249 | 25 |
| **Isoproturon** | Phenylurea | HB | 17.09 | 358 | 146 ˃72 ˃206 | 26 |
| **Aldrin** | Organochlorine | IN | 18.45 | 100 | 101 ˃126 ˃198 | 27 |
| **Malathion** | Organophosphate | IN | 18.26 | 173 | 127 ˃125 ˃93 | 28 |
| **Spiroxamine II** | Morpholine | FU | 18.23 | 263 | 66 ˃265 ˃261 | 29 |
| **Pirimiphos-methyl** | Organophosphate | IN | 18.31 | 233 | 290 ˃276 ˃305 | 30 |
| **Chlorpyrifos** | Organophosphate | IN | 18.46 | 197 | 199 ˃314 ˃97 | 31 |
| **Heptachlor epoxide (trans, isomer A)** | Organochlorine | IN | 20.70 | 351 | 353 ˃355 ˃357 | 32 |
| **Pendimethalin** | Dinitroaniline | HB | 20.99 | 252 | 253 ˃281 ˃162 | 33 |
| **Captan** | Dicarboximide | FU | 21.10 | 79 | 80 ˃ 151 ˃ 77 | 34 |
| **Fipronil** | Aminopyrazole carbonitrile | IN | 21.13 | 367 | 369 ˃213 ˃351 | 35 |
| **Cyprodinil** | Anilinopyrimidine | FU | 21.28 | 224 | 225 ˃210 ˃226 | 36 |
| **Penconazole** | Triazole | FU | 21.48 | 248 | 159 ˃161 ˃250 | 37 |
| **Folpet** | Phthalimide | FU | 21.59 | 104 | 76 ˃260 ˃147 | 38 |
| **trans Chlordane** | Organochlorine | IN | 21.79 | 373 | 375 ˃377 ˃371 | 39 |
| **Procymidone** | Dicarboximide | FU | 22.03 | 96 | 283 ˃285 ˃67 | 40 |
| **Fluopyram** | Pyridylethylamide | FU, NE | 22.14 | 173 | 145 ˃195 ˃223 | 41 |
| **Prallethrin cis** | Pyrethroid | IN | 22.17 | 123 | 105 ˃81 ˃134 | 42 |
| **Prallethrin trans** | Pyrethroid | IN | 22.24 | 123 | 81 ˃105 ˃77 | 43 |
| **Paclobutrazol** | Triazole | PG | 22.40 | 236 | 125 ˃238 ˃167 | 44 |
| **Alpha Endosulfan** | Organochlorine | IN | 22.43 | 241 | 195 ˃239 ˃238 | 45 |
| **cis Chlordane** | Organochlorine | IN | 22.47 | 373 | 375 ˃377 ˃371 | 46 |
| **Flutriafol** | Triazole | FU | 23.17 | 123 | 219 ˃164 ˃83 | 47 |
| **Imazalil** | Imidazole | FU | 23.40 | 41 | 215 ˃173 ˃217 | 48 |
| **Hexaconazole** | Triazole | FU | 23.53 | 83 | 214 ˃216 ˃82 | 49 |
| **Fludioxonil** | Phenylpyrrole | FU | 23.85 | 248 | 127 ˃154 ˃182 | 50 |
| **Dieldrin** | Organochlorine | IN | 23.72 | 79 | 263 ˃277 ˃279 | 51 |
| **p, p' - DDE** | Organochlorine metabolite | IN | 23.77 | 246 | 318 ˃316 ˃248 | 52 |
| **Kresoxim methyl** | Strobilurin | FU | 24.36 | 116 | 206 ˃131 ˃132 | 53 |
| **Myclobutanil** | Triazole | FU | 24.52 | 179 | 150 ˃181 ˃82 | 54 |
| **Chlorfenapyr** | Halogenated pyrrole | IN | 24.68 | 59 | 247 ˃249 ˃408 | 55 |
| **Endrin** | Organochlorine | IN | 24.60 | 263 | 317 ˃265 ˃245 | 56 |
| **Buprofezin** | Thiadiazine | IN, AC | 24.95 | 105 | 104 ˃106 ˃172 | 57 |
| **Beta Endosulfan** | Organochlorine | IN | 25.09 | 195 | 237 ˃207 ˃241 | 58 |
| **Bupirimate** | Aminopyrimidine | FU | 25.20 | 273 | 208 ˃316 ˃166 | 59 |
| **Cyproconazole** | Triazole | FU | 25.44 | 222 | 139 ˃224 ˃125 | 60 |
| **p, p' - DDD** | Organochlorine metabolite | IN | 25.49 | 235 | 237 ˃165 ˃236 | 61 |
| **Oxadixyl** | Phenylamide | FU | 26.21 | 105 | 163 ˃132 ˃77 | 62 |
| **Endosulfan sulfate** | Organochlorine metabolite | IN | 26.53 | 272 | 274 ˃229 ˃237 | 63 |
| **Propiconazole I** | Triazole | FU | 26.60 | 69 | 173 ˃259 ˃175 | 64 |
| **Trifloxystrobin** | Strobilurin | FU | 26.73 | 116 | 131 ˃59 ˃172 | 65 |
| **Propiconazole II** | Triazole | FU | 26.79 | 173 | 69 ˃259 ˃175 | 66 |
| **p, p' - DDT** | Organochlorine metabolite | IN | 26.77 | 235 | 237 ˃165 ˃236 | 67 |
| **Quinoxifen** | Quinoline | FU | 26.85 | 237 | 272 ˃309 ˃307 | 68 |
| **Tebuconazole** | Triazole | FU | 27.28 | 125 | 250 ˃70 ˃83 | 69 |
| **Spiromesifen** | Spirocyclic tetronic acid | IN | 27.83 | 272 | 99 ˃ 273 ˃ 254 | 70 |
| **Endrin ketone** | Organochlorine metabolite | IN | 28.00 | 317 | 67 ˃315 ˃319 | 71 |
| **Phosmet** | Organophosphate | IN | 28.24 | 160 | 161 ˃77 ˃93 | 72 |
| **Bifenthrin** | Pyrethroid | IN | 28.43 | 181 | 165 ˃166 ˃182 | 73 |
| **Fenoxycarb** | Carbamate | IN | 28.56 | 255 | 186 ˃77 ˃185 | 74 |
| **Metoxychlor** | Organochlorine | IN | 28.60 | 113 | 152 ˃227 ˃228 | 75 |
| **Etoxazole** | Diphenyloxazoline | AC | 28.64 | 141 | 204 ˃300 ˃359 | 76 |
| **Permethrin I** | Pyrethroid | IN | 31.04 | 183 | 163 ˃165 ˃184 | 77 |
| **Pyridaben** | Pyridazinone | IN, AC | 31.24 | 147 | 117 ˃148 ˃132 | 78 |
| **Permethrin II** | Pyrethroid | IN | 31.23 | 183 | 163 ˃165 ˃184 | 79 |
| **Cyflutrin I** | Pyrethroid | IN | 31.84 | 163 | 206 ˃165 ˃226 | 80 |
| **Cyfluthrin II** | Pyrethroid | IN | 31.99 | 163 | 206 ˃165 ˃226 | 81 |
| **Cyfluthrin III** | Pyrethroid | IN | 32.06 | 163 | 206 ˃165 ˃226 | 82 |
| **Cyfluthrin IV** | Pyrethroid | IN | 32.13 | 163 | 206 ˃165 ˃226 | 83 |
| **Cypermethrin I** | Pyrethroid | IN | 32.21 | 181 | 163 ˃165 ˃209 | 84 |
| **Cypermethrin II** | Pyrethroid | IN | 32.37 | 181 | 163 ˃165 ˃209 | 85 |
| **Cypermethrin III** | Pyrethroid | IN | 32.44 | 181 | 163 ˃165 ˃209 | 86 |
| **Cypermethrin IV** | Pyrethroid | IN | 32.51 | 181 | 163 ˃165 ˃209 | 87 |
| **Boscalid** | Carboxamide aka anilide | FU | 32.40 | 140 | 342 ˃344 ˃142 | 88 |
| **Ethofenprox** | Pyrethroid | IN | 32.75 | 163 | 164 ˃135 ˃107 | 89 |
| **Azoxystrobin** | Strobilurin | FU | 35.68 | 344 | 388 ˃345 ˃372 | 90 |

*AC – acaricide, IN – insecticide, NE – nematocide, FU –fungicide, PG – plant growth regulator, HB – herbicide

**Table S3**: Validation parameters – calibration curves, correlation coefficients, linearity (range 5 – 50 µg/kg), recovery for two spiked levels and and relative standard deviations (RSDr)

| **Analite** | **Calibration curve** | **R2** | **Spike 0.005 mg/kgb** | | **Spike 0.050 mg/kgb** | |
| --- | --- | --- | --- | --- | --- | --- |
| **Rec (%)** | **RSDr (%)** | **Rec (%)** | **RSDr (%)** |
| **Dichlorvos** | y=4.474x -26.955 | 0.994591 | 85.2 | 5.94 | 89.2 | 6.12 |
| **Acephate** | y=0.826x – 38.023 | 0.991543 | 89.2 | 1.94 | 93.7 | 3.22 |
| **Propoxur** | y=7.484x – 157.22 | 0.998957 | 95.3 | 2.81 | 94.2 | 2.15 |
| **Omethoate** | y=2.153x – 10.326 | 0.999482 | 102.9 | 5.89 | 103.2 | 4.58 |
| **Ethoprophos** | y=1.822x – 50.872 | 0.991542 | 115.2 | 6.93 | 110.5 | 5.21 |
| **Diphenylamine** | y=4.901x – 32.962 | 0.998422 | 114.2 | 11.94 | 116.8 | 7.49 |
| **Chlorpropham** | y=1.486x – 9.846 | 0.991894 | 76.9 | 9.61 | 78.2 | 8.91 |
| **Dioxabenzofos** | y=0.894x – 11.248 | 0.999877 | 77.4 | 1.13 | 81.5 | 2.61 |
| **Alpha Lindan** | y=1.658x – 10.348 | 0.998972 | 95.2 | 3.24 | 99.7 | 3.44 |
| **Dimethoate** | y=2.791x – 88.974 | 0.994717 | 96.8 | 3.01 | 96.2 | 3.94 |
| **Carbofuran** | y=1.726x – 49.667 | 0.999944 | 97.5 | 1.77 | 95.4 | 2.14 |
| **Beta Lindan** | y=1.239x – 10.425 | 0.997118 | 96.6 | 1.13 | 97.4 | 1.05 |
| **Lindan** | y=1.355x – 6.084 | 0.997911 | 74.5 | 3.30 | 75.9 | 3.29 |
| **Diazinon** | y=1.175x – 19.302 | 0.999655 | 109.2 | 1.78 | 109.1 | 2.94 |
| **Delta HCH** | y=1.223x – 18.199 | 0.996887 | 107.6 | 1.50 | 115.2 | 1.97 |
| **Phosphamidon I** | y=0.409x + 8.111 | 0.997948 | 112.3 | 6.74 | 119.6 | 3.64 |
| **Pyrimethanil** | y=3.519x + 26.515 | 0.994892 | 74.8 | 10.7 | 94.2 | 7.79 |
| **Phosphamidon II** | y=0.795x + 11.949 | 0.999489 | 75.8 | 6.71 | 78.1 | 6.15 |
| **Methyl Parathion** | y=1.566x – 50.917 | 0.992631 | 85.2 | 5.45 | 85.1 | 6.93 |
| **Spiroxamine I** | y=5.264x – 133.13 | 0.998944 | 82.9 | 2.53 | 83.9 | 6.11 |
| **Heptachlor** | y=0.719x – 59.083 | 0.999948 | 88.5 | 2.98 | 94.1 | 3.01 |
| **Chlorpyriphos methyl** | y=0.884x + 9.994 | 0.999773 | 88.9 | 9.19 | 99.0 | 2.76 |
| **Vinclozolin** | y=0.445x – 9.789 | 0.999119 | 99.8 | 2.48 | 99.1 | 1.08 |
| **Carbaryl** | y=1.881x – 210.91 | 0.999817 | 97.5 | 2.73 | 94.5 | 7.28 |
| **Metalaxyl** | y=1.497x – 13.587 | 0.999499 | 94.5 | 3.04 | 93.2 | 2.45 |
| **Isoproturon** | y=1.984x – 10.998 | 0.994795 | 94.2 | 1.52 | 95.8 | 1.38 |
| **Aldrin** | y=0.507x – 3.657 | 0.991914 | 99.9 | 3.64 | 102.1 | 4.11 |
| **Malathion** | y=2.136x – 87.645 | 0.999006 | 102.9 | 2.54 | 101.8 | 3.61 |
| **Spiroxamine II** | y=8.345x – 552.90 | 0.998007 | 99.5 | 3.17 | 100.7 | 9.15 |
| **Pirimiphos-methyl** | y=1.563x – 3.648 | 0.997981 | 107.4 | 3.91 | 108.1 | 10.52 |
| **Chlorpyrifos** | y=1.531x – 93.506 | 0.998887 | 106.2 | 4.81 | 106.9 | 1.94 |
| **Heptachlor epoxide (trans, isomer A)** | y=0.239x – 3.633 | 0.992524 | 93.7 | 6.72 | 95.1 | 14.35 |
| **Pendimethalin** | y=0.556x – 45.370 | 0.998781 | 93.1 | 11.95 | 94.9 | 5.74 |
| **Captan** | y=0.789x – 3.796 | 0.999789 | 105.2 | 10.94 | 110.5 | 8.52 |
| **Fipronil** | y=0.441x – 11.649 | 0.998847 | 100.9 | 9.18 | 101.2 | 1.48 |
| **Cyprodinil** | y=3.154x – 4.526 | 0.998788 | 98.7 | 8.94 | 103.2 | 1.92 |
| **Penconazole** | y=1.547x – 55.849 | 0.997711 | 95.4 | 3.46 | 104.9 | 5.16 |
| **Folpet** | y=0.903x – 78.799 | 0.995877 | 95.1 | 1.28 | 95.2 | 4.25 |
| **trans Chlordane** | y=0.462x – 2.332 | 0.998275 | 103.4 | 2.84 | 103.7 | 3.23 |
| **Procymidone** | y=2.470x – 52.523 | 0.995548 | 102.5 | 3.96 | 103.1 | 3.11 |
| **Fluopyram** | y=3.156x – 17.526 | 0.994857 | 96.2 | 13.41 | 94.1 | 2.88 |
| **Prallethrin cis** | y=0.821x – 18.406 | 0.993233 | 98.2 | 12.95 | 98.6 | 9.21 |
| **Prallethrin trans** | y=1.038x – 42.422 | 0.991258 | 97.8 | 3.43 | 111.2 | 6.43 |
| **Paclobutrazol** | y=0.957x – 30.544 | 0.993218 | 93.7 | 3.34 | 100.5 | 6.51 |
| **Alpha Endosulfan** | y=0.288x – 5.093 | 0.995445 | 85.2 | 2.77 | 92.4 | 1.94 |
| **cis Chlordane** | y=0.441x – 7.151 | 0.996777 | 85.9 | 1.64 | 87.1 | 1.94 |
| **Flutriafol** | y=2.689x – 11.748 | 0.994879 | 88.9 | 10.60 | 89.5 | 6.47 |
| **Imazalil** | y=0.534x + 0.882 | 0.993567 | 92.4 | 4.61 | 95.1 | 5.15 |
| **Hexaconazole** | y=2.867x + 0.448 | 0.997888 | 94.1 | 14.12 | 94.6 | 2.31 |
| **Fludioxonil** | y=1.092x – 22.616 | 0.996892 | 94.7 | 2.47 | 98.8 | 6.25 |
| **Dieldrin** | y=2.838x – 27.454 | 0.999409 | 99.7 | 2.02 | 105.4 | 4.75 |
| **p, p' - DDE** | y=2.067x – 9.143 | 0.999913 | 96.8 | 2.15 | 100.1 | 3.08 |
| **Kresoxim methyl** | y=2.834x – 58.783 | 0.998837 | 97.5 | 5.79 | 100.9 | 1.99 |
| **Myclobutanil** | y=2.677x – 23.511 | 0.996974 | 97.6 | 5.55 | 97.9 | 10.9 |
| **Chlorfenapyr** | y=0.345x – 7.290 | 0.999715 | 98.4 | 4.36 | 99.3 | 1.05 |
| **Endrin** | y=0.318x – 8.653 | 0.996120 | 106.4 | 2.94 | 106.1 | 1.90 |
| **Buprofezin** | y=3.652x – 14.641 | 0.997945 | 103.5 | 1.08 | 100.0 | 2.05 |
| **Beta Endosulfan** | y=0.308x – 5.381 | 0.998889 | 100.1 | 2.91 | 108.2 | 3.92 |
| **Bupirimate** | y=1.941x – 11.052 | 0.998118 | 96.1 | 3.78 | 97.5 | 3.99 |
| **Cyproconazole** | y=2.264x – 24.749 | 0.997748 | 93.3 | 3.17 | 95.8 | 5.21 |
| **p, p' - DDD** | y=3.490x – 37.424 | 0.994687 | 93.9 | 3.08 | 94.8 | 4.17 |
| **Oxadixyl** | y=3.155x – 21.899 | 0.993949 | 110.2 | 4.67 | 97.9 | 10.94 |
| **Endosulfan sulfate** | y=0.282x – 6.980 | 0.998699 | 99.9 | 1.90 | 104.2 | 12.5 |
| **Propiconazole I** | y=1.586x – 32.113 | 0.998584 | 102.3 | 2.94 | 101.9 | 5.94 |
| **Trifloxystrobin** | y=1.238x – 86.705 | 0.998673 | 114.0 | 2.41 | 113.8 | 5.01 |
| **Propiconazole II** | y=1.983x – 53.710 | 0.998199 | 103.8 | 1.48 | 115.2 | 3.20 |
| **p, p' - DDT** | y=2.137x – 148.88 | 0.998965 | 102.3 | 9.72 | 109.4 | 8.48 |
| **Quinoxifen** | y=2.559x – 9.855 | 0.998119 | 94.8 | 10.82 | 93.6 | 2.55 |
| **Tebuconazole** | y=1.780x – 46.884 | 0.999526 | 96.8 | 10.64 | 97.8 | 2.03 |
| **Spiromesifen** | y=0.140x – 24.870 | 0.992153 | 94.1 | 1.85 | 99.1 | 1.29 |
| **Endrin ketone** | y=0.216x + 1.631 | 0.997496 | 96.6 | 2.31 | 96.9 | 1.35 |
| **Phosmet** | y=3.378x – 136.602 | 0.992964 | 96.8 | 2.65 | 103.5 | 1.33 |
| **Bifenthrin** | y=4.292x – 13.071 | 0.999449 | 97.3 | 2.48 | 101.5 | 4.94 |
| **Fenoxycarb** | y=1.063x – 31.298 | 0.990421 | 98.2 | 5.14 | 97.0 | 1.65 |
| **Metoxychlor** | y=4.591x – 45.894 | 0.996743 | 104.5 | 2.51 | 105.7 | 1.19 |
| **Etoxazole** | y=1.010x – 26.167 | 0.999091 | 106.8 | 3.88 | 108.0 | 1.83 |
| **Permethrin I** | y=0.549x + 2.312 | 0.999783 | 109.4 | 3.51 | 105.2 | 13.51 |
| **Pyridaben** | y=4.694x – 62.409 | 0.990974 | 100.9 | 1.24 | 103.8 | 11.08 |
| **Permethrin II** | y=3.477x – 36.719 | 0.999452 | 108.7 | 1.86 | 97.8 | 5.18 |
| **Cyflutrin I** | y=0.362x – 0.587 | 0.999118 | 100.1 | 2.13 | 95.6 | 1.22 |
| **Cyfluthrin II** | y=0.297x + 1.978 | 0.994794 | 105.2 | 6.80 | 95.4 | 1.64 |
| **Cyfluthrin III** | y=0.154x + 18.104 | 0.992889 | 104.2 | 9.16 | 99.2 | 1.08 |
| **Cyfluthrin IV** | y=0.361x – 3.247 | 0.995577 | 103.2 | 8.55 | 92.4 | 7.16 |
| **Cypermethrin I** | y=0.321x – 11.233 | 0.997155 | 94.5 | 8.52 | 93.7 | 7.15 |
| **Cypermethrin II** | y=0.412x – 2.367 | 0.990974 | 94.2 | 1.77 | 93.0 | 2.33 |
| **Cypermethrin III** | y=0.294x – 2.384 | 0.999587 | 96.2 | 5.93 | 95.1 | 4.73 |
| **Cypermethrin IV** | y=0.389x – 9.559 | 0.999225 | 94.1 | 5.11 | 96.5 | 1.86 |
| **Boscalid** | y=3.190x – 10.489 | 0.997779 | 94.8 | 10.49 | 98.8 | 2.44 |
| **Ethofenprox** | y=4.831x – 10.478 | 0.999101 | 96.9 | 10.34 | 102.8 | 1.97 |
| **Azoxystrobin** | y=0.733x + 17.324 | 0.996657 | 97.8 | 7.19 | 102.2 | 3.61 |

a - limit of quantification 0.005 mg/kg. Measurement uncertainty: laboratory value 35%, adopted 50%.

b - Recovery (Rec) and precision (RSDr) asssays: spiked blank sediment, n=6

**Table S4**: Concentrations of elements in the muscle tissue of the black bullhead are expressed in mg kg-1 wet weight

|  | **Pb** | **Cd** | **As** | **Hg** | **Cu** | **Fe** | **Zn** |
| --- | --- | --- | --- | --- | --- | --- | --- |
| **Control** | 0.14 | 0.01 | nd | nd | 0.42 | 7.64 | 28.60 |
| **June** | 0.08 | 0.01 | nd | nd | 0.96 | 9.72 | 41.10 |
| **July** | 0.08 | 0.02 | nd | nd | 0.40 | 6.83 | 25.30 |
| **August** | 0.13 | 0.01 | nd | nd | 0.42 | 6.53 | 20.70 |
| **September** | 0.12 | 0.01 | nd | nd | 0.39 | 6.31 | 25.60 |

*nd- non detected
